# Supplementary material for: A study of the feeding characteristics of a small and medium-sized copepod species (Sinocalanus tenellus) using genetic analysis techniques: seasonal comparison of potential/eaten food sources focused on phytoplankton
Source: Frontiers journal article supplement (doi:10.3389/fmars.2023.1234754), 2023-09-12
Supplement: Table_1.docx [file Table_1.docx]

Supplementary Material

A study of the Feeding Characteristics of a Small and Medium-Sized Copepod species (*Sinocalanus tenellus*) Using Genetic Analysis Techniques: Seasonal Comparison of Potential/Eaten Food Sources focused on Phytoplankton

Yeon-Ji Chae1, Hye-Ji Oh1*, Ihn-Sil Kwak2, Kwang-Hyeon Chang1*, Hyunbin Jo3*

*** Correspondence:** Hye-Ji Oh: [ohg2090@naver.com](mailto:ohg2090@naver.com), Kwang-Hyeon Chang: [chang38@khu.ac.kr](mailto:chang38@khu.ac.kr), Hyunbin Jo: prozeva@pusan.ac.kr

# Supplementary Tables

Table S1 Information on phytoplankton species detected as potential food sources of *Sinocalanus tenellus* in each season: Accession number, Identity (%), the number of reads and their relative abundance (RA%) are indicated

| Phylum | Class | Order/Family  /Genus/Species | Accession Number | Identity  (%) | The number of reads (RA%) | | | |
| --- | --- | --- | --- | --- | --- | --- | --- | --- |
| Winter | Spring | Summer | Fall |
| Cyanobacteria | Cyanophyceae | Genus Chroococcidiopsis | FJ805907.1 | 99 | 0 | 0 | 111 (4.5) | 0 |
| Order Pleurocapsales | KM458385.1 | 99 | 0 | 0 | 242 (9.9) | 0 |
| *Cyanobium* sp. | AM709626.1 | 97 | 0 | 0 | 0 | 916 (5.2) |
| *Synechococcus rubescens* | AM709629.1 | 99 | 0 | 1,268 (6.1) | 0 | 0 |
| *Synechococcus* spp. | CP035632.1 AM709627.1 CP060396.1 CP039373.1 CP039373.1 CP060395.1 | - | 0 | 7,584 (36.4) | 1,395 (56.9) | 13,999 (80.1) |
| Cryptophyta | Cryptophyceae | *Cryptophyta* sp. | MG646436.1 | 100 | 3,801 (8.1) | 0 | 0 | 0 |
| *Chroomonas* sp. | JX470952.1 | 99 | 0 | 0 | 102 (4.2) | 0 |
| Ochrophyta | Eustigmatophyceae | *Microchloropsis salina* | KJ410685.1 | 99 | 0 | 0 | 108 (4.4) | 0 |
| Bacillariophyta | Bacillariophyceae | *Actinocyclus subtilis* | NC038000.1 | 98 | 40,706 (86.4) | 1,203 (5.8) | 241 (9.8) | 0 |
| Chlorophyta | Trebouxiophyceae | *Geminella minor* | KM462883.1 | 98 | 1,282 (2.7) | 10,764 (51.7) | 254 (10.4) | 2,559 (14.6) |
| Haptista | Prymnesiophyceae | *Isochrysis galbana* | MT304829.1 | 97 | 1,324 (2.8) | 0 | 0 | 0 |
| Sum of read numbers | | | | | 47,113 (100) | 20,819 (100) | 2,453 (100) | 17,474 (100) |

Table S2 Information on phytoplankton species detected as eaten food sources of *Sinocalanus tenellus* in each season: Accession number, Identity (%), the number of reads of and their relative abundance (RA%) are indicated

| Phylum | Class | Order/Family  /Genus/Species | Accession Number | Identity  (%) | The number of reads (RA%) | | | |
| --- | --- | --- | --- | --- | --- | --- | --- | --- |
| Winter | Spring | Summer | Fall |
| Cyanobacteria | Cyanophyceae | Order Oscillatoriales | KM458399.1 | 97 | 0 | 0 | 0 | 2,174 (100) |
| Genus Leptolyngbya | AP018206.1 | 96 | 179 (4.5) | 0 | 0 | 0 |
| *Cyanobium* sp. | AM709626.1 | 97 | 0 | 0 | 668 (3.0) | 0 |
| *Synechococcus* spp. | AM709627.1 CP035632.1 CP060396.1 CP039373.1 CP039373.1 CP060395. | - | 862 (21.6) | 303 (8.8) | 14,853 (67.5) | 0 |
| Unidentified eukaryotic alga | | | KU585626.1 | 97 | 408 (10.2) | 0 | 5,426 (24.7) | 0 |
| Ochrophyta | Eustigmatophyceae | *Microchloropsis salina* | KJ410685.1 | 99 | 398 (10.0) | 0 | 0 | 0 |
| Bacillariophyta | Bacillariophyceae | *Actinocyclus subtilis* | NC_038000.1 | 98 | 0 | 752 (21.8) | 0 | 0 |
| *Cyclotella* sp. | KJ958481.1 | 100 | 877 (22.0) | 0 | 439 (2.0) | 0 |
| Chlorophyta | Chlorophyceae | *Mychonastes homosphaera* | KT199249.1 | 99 | 0 | 1,123 (32.6) | 0 | 0 |
| *Scenedesmus* sp. | HE717104.1 | 98 | 0 | 0 | 625 (2.8) | 0 |
| Chlorophyta | Trebouxiophyceae | *Chlorella pyrenoidosa* | MN128434.1 | 99 | 959 (24.1) | 0 | 0 | 0 |
| *Geminella minor* | KM462883.1 | 98 | 301 (7.6) | 0 | 0 | 0 |
| Genus Planctonema | KM462880.1 | 96 | 0 | 1,270 (36.8) | 0 | 0 |
| Sum of read numbers | | | | | 1,260 (100) | 3,448 (100) | 22,011 (100) | 2,174 (100) |
